# Supplementary material for: Evaluation and Comparison of Multiple Aligners for Next-Generation Sequencing Data Analysis
Source: Hindawi journal article supplement (doi:10.1155/2014/309650), 2014-01-01
Supplement: f1 [file 309650.f1.pdf]

**Supplementary file 1. The detail information for 25 aligners collected from different websites and published articles**

| <b>Software</b>     | <b>OS</b>              | <b>Language</b> | <b>Reference</b> | <b>Links</b>                                                                                                                                                                                            |
|---------------------|------------------------|-----------------|------------------|---------------------------------------------------------------------------------------------------------------------------------------------------------------------------------------------------------|
| <b>BOAT</b>         | Linux/Unix<br>32/64bit | C               | PMID: 19958483   | <a href="http://boat.cbi.pku.edu.cn">http://boat.cbi.pku.edu.cn</a>                                                                                                                                     |
|                     | Linux/Unix<br>32/64bit |                 |                  |                                                                                                                                                                                                         |
| <b>Bowtie</b>       | Windows                | C++             | PMID:19261174    | <a href="http://bowtie-bio.sourceforge.net/index.shtml">http://bowtie-bio.sourceforge.net/index.shtml</a>                                                                                               |
|                     | Mac OS<br>X/Solaris    |                 |                  |                                                                                                                                                                                                         |
| <b>BS Seeker</b>    | Linux/Unix<br>32/64bit | Python          | PMID:20416082    | <a href="http://sourceforge.net/projects/bsseeker/files/BS%20Seeker2004-23-2010/examples.tgz/download">http://sourceforge.net/projects/bsseeker/files/BS%20Seeker2004-23-2010/examples.tgz/download</a> |
|                     | Mac OS X<br>32/64bit   |                 |                  |                                                                                                                                                                                                         |
| <b>BWA</b>          | Linux/Unix<br>32/64bit | C++             | PMID:19451168    | <a href="http://bio-bwa.sourceforge.net/">http://bio-bwa.sourceforge.net/</a>                                                                                                                           |
| <b>GASSST</b>       | Linux/Unix<br>32/64bit | C++             | PMID: 2073910    | <a href="http://www.irisa.fr/symbiose/projects/gassst/">http://www.irisa.fr/symbiose/projects/gassst/</a>                                                                                               |
| <b>GenomeMapper</b> | Linux/Unix<br>32/64bit | C               | PMID:19761611    | <a href="http://1001genomes.org/downloads/genomemapper.html">http://1001genomes.org/downloads/genomemapper.html</a>                                                                                     |
| <b>GSNAP</b>        | Linux/Unix<br>32/64bit | C               | PMID: 20147302   | <a href="http://research-pub.gene.com/gmap/">http://research-pub.gene.com/gmap/</a>                                                                                                                     |
| <b>GNUMAP</b>       | Linux/Unix<br>32/64bit | C               | PMID:19861355    | <a href="http://dna.cs.byu.edu/gnumap/download.cgi">http://dna.cs.byu.edu/gnumap/download.cgi</a>                                                                                                       |

## Supplementary file 2. The version list of the aligners involved in the evaluation process

| Software            | Version           | websites                                                                                                                                  |
|---------------------|-------------------|-------------------------------------------------------------------------------------------------------------------------------------------|
| <b>Bowtie</b>       | bowtie-v0.12.7    | <a href="http://bowtie-bio.sourceforge.net/index.shtml">http://bowtie-bio.sourceforge.net/index.shtml</a>                                 |
| <b>SOAPv2</b>       | SOAPaligner-v2.21 | <a href="http://soap.genomics.org.cn/">http://soap.genomics.org.cn/</a>                                                                   |
| <b>BWA</b>          | bwa-0.5.8a        | <a href="http://bio-bwa.sourceforge.net/">http://bio-bwa.sourceforge.net/</a>                                                             |
| <b>PerM</b>         | PerM-v0.3.6       | <a href="http://code.google.com/p/perm/">http://code.google.com/p/perm/</a>                                                               |
| <b>mrsFAST</b>      | mrsfast-v2.3.0.2  | <a href="http://sourceforge.net/projects/mrfast/files/mrsfast/2.3.0.2/">http://sourceforge.net/projects/mrfast/files/mrsfast/2.3.0.2/</a> |
| <b>GASSST</b>       | Gassst-v1.28      | <a href="http://www.irisa.fr/symbiose/projects/gassst/">http://www.irisa.fr/symbiose/projects/gassst/</a>                                 |
| <b>PASS</b>         | pass-v1.62        | <a href="http://pass.cribi.unipd.it/cgi-bin/pass.pl">http://pass.cribi.unipd.it/cgi-bin/pass.pl</a>                                       |
| <b>BOAT</b>         | boat-v1.0         | <a href="http://www.seqan.de/downloads/projects.html#c13">http://www.seqan.de/downloads/projects.html#c13</a>                             |
| <b>RazerS</b>       | RazerS-20100618   | <a href="http://bowtie-bio.sourceforge.net/index.shtml">http://bowtie-bio.sourceforge.net/index.shtml</a>                                 |
| <b>RMAP</b>         | rmap-v2.05        | <a href="http://rulai.cshl.edu/rmap/">http://rulai.cshl.edu/rmap/</a>                                                                     |
| <b>MAQ</b>          | maq-0.7.1         | <a href="http://maq.sourceforge.net/">http://maq.sourceforge.net/</a>                                                                     |
| <b>Novoalign</b>    | Novocraft-v2.05   | <a href="http://www.novocraft.com/">http://www.novocraft.com/</a>                                                                         |
| <b>mrFAST</b>       | mrFast-v2.1.0.1   | <a href="http://mrfast.sourceforge.net/">http://mrfast.sourceforge.net/</a>                                                               |
| <b>SeqMap</b>       | SeqMap-v 1.0.12   | <a href="http://biogibbs.stanford.edu/~jiangh/seqmap/">http://biogibbs.stanford.edu/~jiangh/seqmap/</a>                                   |
| <b>Segemehl</b>     | Segemehl-v0.1.2   | <a href="http://www.bioinf.uni-leipzig.de/Software/segemehl/">http://www.bioinf.uni-leipzig.de/Software/segemehl/</a>                     |
| <b>SHRiMAP</b>      | SHRiMP-v2.2.1     | <a href="http://compbio.cs.toronto.edu/shrimp/">http://compbio.cs.toronto.edu/shrimp/</a>                                                 |
| <b>Gnumap</b>       | Gnumap-v3.0.2     | <a href="http://dna.cs.byu.edu/gnumap/">http://dna.cs.byu.edu/gnumap/</a>                                                                 |
| <b>GenomeMapper</b> | genomemapper0.4.3 | <a href="http://1001genomes.org/downloads/genomemapper.html">http://1001genomes.org/downloads/genomemapper.html</a>                       |
| <b>SSAHA2</b>       | ssaha2_v2.5.3     | <a href="http://www.sanger.ac.uk/resources/software/ssaha2/">http://www.sanger.ac.uk/resources/software/ssaha2/</a>                       |

---

|                                 |                                                           |      |                                                    |                                                                                                         |
|---------------------------------|-----------------------------------------------------------|------|----------------------------------------------------|---------------------------------------------------------------------------------------------------------|
| <b>MAQ</b>                      | Linux/Unix<br>32/64bit                                    | C++  | PMID:18714091                                      | <a href="http://maq.sourceforge.net/">http://maq.sourceforge.net/</a>                                   |
| <b>MOM</b>                      | Windows<br>32/64bit<br>Linux/Unix<br>32/64bit             | Java | PMID: 19228804                                     | <a href="http://mom.csbc.vcu.edu/">http://mom.csbc.vcu.edu/</a>                                         |
| <b>Mosaik</b>                   | Windows<br>32/64bit<br>Linux/Unix<br>32/64bit             | C++  | N/A                                                | <a href="http://bioinformatics.bc.edu/marthlab/Mosaik">http://bioinformatics.bc.edu/marthlab/Mosaik</a> |
| <b>mrFAST &amp;<br/>mrsFAST</b> | Windows<br>32/64bit<br>Linux/Unix<br>32/64bit             | C    | PMID: 19718026<br>PMID: 19447966<br>PMID: 19483690 | <a href="http://mrfast.sourceforge.net/">http://mrfast.sourceforge.net/</a>                             |
| <b>MUMmer</b>                   | Linux/Unix<br>32/64bit                                    | C++  | PMID: 14759262                                     | <a href="http://mummer.sourceforge.net/">http://mummer.sourceforge.net/</a>                             |
| <b>Novoalign</b>                | Linux/Unix<br>32/64bit                                    | C++  | N/A                                                | <a href="http://www.novocraft.com/">http://www.novocraft.com/</a>                                       |
| <b>PASS</b>                     | Windows<br>32/64bit<br>Linux/Unix<br>32/64bit             | C++  | PMID:19218350                                      | <a href="http://pass.cribi.unipd.it/cgi-bin/pass.pl">http://pass.cribi.unipd.it/cgi-bin/pass.pl</a>     |
| <b>PerM</b>                     | Windows<br>32/64bit<br>Linux/Unix<br>32/64bit             | C++  | PMID: 19675096                                     | <a href="http://code.google.com/p/perm/">http://code.google.com/p/perm/</a>                             |
| <b>RazerS</b>                   | Windows<br>32/64bit<br>Linux/Unix<br>32/64bit<br>Mac X OS | C++  | PMID: 19592482                                     | <a href="http://www.seqan.de/projects/razers.html">http://www.seqan.de/projects/razers.html</a>         |

---

---

|                 |                                                |        |                                  |                                                                                                                                                             |
|-----------------|------------------------------------------------|--------|----------------------------------|-------------------------------------------------------------------------------------------------------------------------------------------------------------|
|                 | 32/64bit                                       |        |                                  |                                                                                                                                                             |
| <b>RMAP</b>     | Linux/Unix<br>32/64bit                         | C++    | PMID:19736251                    | <a href="http://rulai.cshl.edu/rmap/">http://rulai.cshl.edu/rmap/</a>                                                                                       |
| <b>Segemehl</b> | Linux/Unix<br>32/64bit                         | C      | PMID:19750212                    | <a href="http://www.bioinf.uni-leipzig.de/Software/segemehl/">http://www.bioinf.uni-leipzig.de/Software/segemehl/</a>                                       |
|                 | Windows<br>32/64bit                            |        |                                  |                                                                                                                                                             |
| <b>SeqMap</b>   | Linux/Unix<br>32/64bit<br>Mac X OS<br>32/64bit | C++    | PMID: 18697769                   | <a href="http://biogibbs.stanford.edu/~jiangh/seqmap/">http://biogibbs.stanford.edu/~jiangh/seqmap/</a>                                                     |
| <b>SHRiMP</b>   | Linux/Unix<br>32/64bit                         | Python | PMID: 19461883                   | <a href="http://compbio.cs.toronto.edu/shrimp/">http://compbio.cs.toronto.edu/shrimp/</a>                                                                   |
|                 | Windows<br>32/64bit                            |        |                                  |                                                                                                                                                             |
| <b>SliderII</b> | Linux/Unix<br>32/64bit<br>Mac X OS<br>32/64bit | Java   | PMID: 18974170                   | <a href="http://www.bcgsc.ca/platform/bioinfo/software/SliderII">http://www.bcgsc.ca/platform/bioinfo/software/SliderII</a>                                 |
| <b>SOAP2</b>    | Linux/Unix<br>64bit                            | C++    | PMID: 18227114<br>PMID: 19497933 | <a href="http://soap.genomics.org.cn/">http://soap.genomics.org.cn/</a>                                                                                     |
| <b>SSAHA2</b>   | Linux/Unix<br>32/64bit<br>Mac X OS<br>32/64bit | N/A    | PMID: 11591649                   | <a href="http://www.sanger.ac.uk/resources/software/ssaha2.html">http://www.sanger.ac.uk/resources/software/ssaha2.html</a>                                 |
| <b>BFAST</b>    | Linux/Unix<br>32/64bit                         | Python | PMID: 19508732<br>PMID: 19907642 | <a href="https://sourceforge.net/apps/mediawiki/bfast/index.php?title=Main_Page">https://sourceforge.net/apps/mediawiki/bfast/index.php?title=Main_Page</a> |

---



**Supplementary file 3. The numbers of citation papers for multiple aligners**

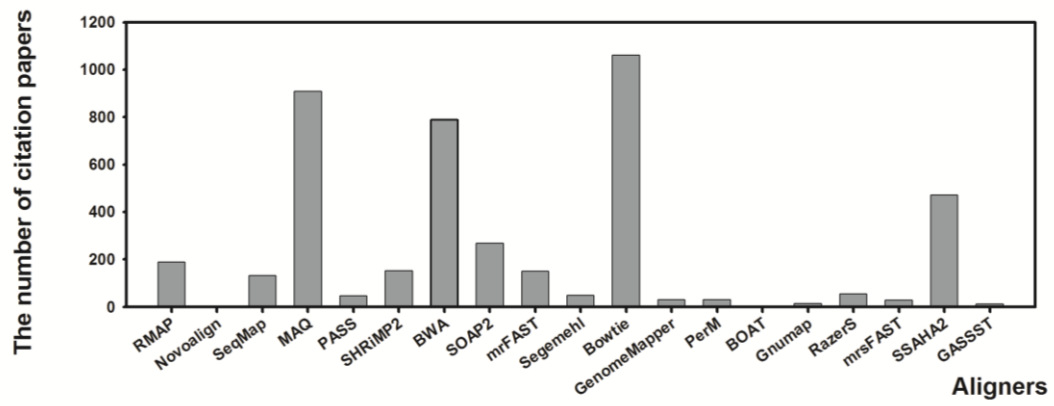

#### Supplementary file 4. A python script was mainly used as memory usage monitor

```
#!/usr/bin/env python

import os

import time

max_mem = 0;

PID = raw_input("Please input your target PID:")

print '    The max_RAM used during this stage is:'

while True:

    fd = os.popen('ps aux')

    fd.readline()

    for line in fd:

        tmp_list = line.split()

        if tmp_list[1] == PID:

            if max_mem < float(tmp_list[3]):

                max_mem = float(tmp_list[3])

                print '    ',max_mem

    time.sleep(1)
```

## Supplementary file 5. A perl script was implemented for computational simulation for *in silico* data

```
#!/usr/bin/perl -w
```

```
=pod
```

This Perl script generate simulated single-end short reads,

written by Yifei Tang,

from Center for Systems Biology, Soochow University,

with no warranty.

We used part of thought by Juliane Dohm and Claudio Lottaz.

```
=cut
```

```
$Usage = <<EOF;
```

Users can simply run this script followed by 5 arguments:

1. Genome sequence file in Fasta format which you will generate reads from.
2. Number of reads to be generated.
3. Length of each read.
4. Assumed sequencing error rate (%).
5. Assumed sequencing indels rate (%).
6. Indels length.
7. Base name of output files. (<basename>\_SE.fa)

Eg. perl simulation\_SE.pl hg.fa 50000 36 0.8 0.0001 4 simread

This command will generates 50000 36-length short reads from "hg.fa

with sequencing error rate 0.8%, output to simread\_SE.fa.

```
EOF
```

```
#Check if a leagal command line is given.
```

```
die "$Usage\n" if (@ARGV != 7);
```



```
#Define variables.

my $in = $ARGV[0];

my $totalreads = $ARGV[1];

my $readlen = $ARGV[2];

my $errorrate = $ARGV[3];

my $insertionrate = $ARGV[4];

my $deletionrate = $ARGV[4];

my $indellength = $ARGV[5];

my $basename = $ARGV[6];

my (@seq, @rev_seq, @chro, @chro_len, @chro_reads);

my $chro_index = 0, $total_len = 0, $errors = 0, $read_index = 0;

#Open input and output files.

open (IN, $in) || die "Genome sequence file not found!\n";

open (OUT, ">$basename\_SE.fa");

open (INDEL, ">indels.txt");

#Read the genome sequence file line by line.

print "Reading genome sequence...\n";

while (<IN>) {

    chomp;

    $_ =~ s/[\n\r]//;

    if ($_ =~ /\>/) {

        if ($chro_index != 0) {

            my $rev_seq = reverse ($seq[$chro_index]);

            $rev_seq =~ tr/ATCGU/TAGCA/;


```

```

    $rev_seq =~ tr/atcgu/tagca/;

    $rev_seq[$chro_index] = $rev_seq;

    $chro_len[$chro_index] = length ($seq[$chro_index]);

    $total_len += $chro_len[$chro_index];

    print "Length of chromosome $chro_index... \"$chro[$chro_index]\" is $chro_len[$chro_index]\n";

}

my $chro = substr ($_, 1, length ($_));

$chro[++$chro_index] = $chro;

print "Processing chromosome $chro_index... \"$chro\"\n";

}elsif ($_ =~ /[ATCGUatcguNn]/) {

    $seq[$chro_index] .= $_;

}

if (eof) {

    my $rev_seq = reverse ($seq[$chro_index]);

    $rev_seq =~ tr/ATCGU/TAGCA/;

    $rev_seq =~ tr/atcgu/tagca/;

    $rev_seq[$chro_index] = $rev_seq;

    $chro_len[$chro_index] = length ($seq[$chro_index]);

    $total_len += $chro_len[$chro_index];

    print "Length of chromosome $chro_index... \"$chro[$chro_index]\" is $chro_len[$chro_index]\n";

}

}

print "Complete with reading genome sequence with the total length of $total_len.\n";

#Determine reads to be generated of each chromosome.

print "Determining reads to be generated of each chromosome...\n";

for (my $n = 1; $n <= $chro_index; $n++) {

    $chro_reads[$n] = int (($chro_len[$n] / $total_len) * $totalreads);

```

```
print "Chromosome $chro[$n] will generate $chro_reads[$n] reads.\n";  
}  
print "Complete with determining reads to be generated of each chromosome.\n";
```

#### **#Main part simulating short reads.**

```
print "Generating short read pairs...\n";  
for (my $n = 1; $n <= $chro_index; $n++) {  
    for (my $m = 0; $m < $chro_reads[$n]; $m++) {  
        $read_index++;  
        my $start = int (rand ($chro_len[$n] - $readlen));  
        my ($sifrev, $errorIndex, $errorBase);  
        my ($sread, $errorread, $indelread);  
        my ($adjustedOriSeq, $adjustedPostSeq);  
        if (rand (1) >= 0.5) {  
            $sread = substr ($seq[$n], $start, $readlen);
```

```

    $ifrev = "+";

} else {

    $read = substr ($rev_seq[$n], $start, $readlen);

    $ifrev = "-";

}

#Generating sequencing error

($errorread, $errorIndex, $errorBase) = &seq_error ($read);

#Generating indels

($indelread, $adjustedOriSeq, $adjustedPostSeq) = &indels ($errorread);

#Checking if uncertain bases reach the number of 10 (N)

my $uncertainbases = 0;

foreach my $base (split (//,$indelread)){

    $uncertainbases++ if ("\U$base" eq "N");

}

if ($uncertainbases >= 10) {$read_index--; redo;}

if ($errorread ne $indelread) {

    print INDEL ">$read_index\_Schro[$n]\_start\n$adjustedOriSeq\n$adjustedPostSeq\n";

}

if ($read ne $errorread) {

    ++$errors;

    chop ($errorIndex), chop ($errorBase);

    print OUT ">read_$read_index\_Schro[$n]\_start\_errorIndex\_errorBase\n$indelread\n";

} else {

    print OUT ">read_$read_index\_Schro[$n]\_start\n$indelread\n";

}

}

print "Complete with generating short reads from Schro[$n].\n";

```

```
}  
  
print "Complete with generating all short reads.\n";  
  
print "You get $errors errors out of $read_index of all generated reads.\a\n";  
  
#Close files opened.  
  
close IN;  
  
close OUT;  
  
close INDEL;
```

#### **#Subroutine processing sequencing error.**

```
sub seq_error {  
  
    my $tmpread = $_[0];  
  
    my @base = split (/, $tmpread);  
  
    $tmpread = "";  
  
    my $errorIndex = "";  
  
    my $errorBase = "";  
  
    for (my $n = 0; $n < @base; $n++) {  
  
        if (rand (100) > $errorrate) {  
  
            $tmpread .= $base[$n];  
  
        }else {  
  
            my %fourbase = ("A", 0, "T", 0, "C", 0, "G", 0);  
  
            delete $fourbase{"\U$base[$n]"};  
  
            my @fourbase = keys (%fourbase);  
  
            my $index = $n + 1;  
  
            my $i = rand (1);
```

```

if ($i < 0.33) {

    $tmpread .= $fourbase[0];

    $errorIndex .= "$index,";

    $errorBase .= $base[$n] . "->" . $fourbase[0] . ",";

}elsif ($i < 0.66) {

    $tmpread .= $fourbase[1];

    $errorIndex .= "$index,";

    $errorBase .= $base[$n] . "->" . $fourbase[1] . ",";

}else {

    $tmpread .= $fourbase[2];

    $errorIndex .= "$index,";

    $errorBase .= $base[$n] . "->" . $fourbase[2] . ",";

}

}

}

return ($tmpread, $errorIndex, $errorBase);

}

```

```

#Deleting deletion sequence

for ($n = 0; $n < $indellength; $n++) {

    $adjustedOriSeq .= $base[$i+$n];

    $adjustedPostSeq .= "-";

}

$i = $i + $indellength - 1;

}else {

    $postSeq .= $base[$i];

    $adjustedOriSeq .= $base[$i];

```

```
        $adjustedPostSeq .= $base[$i];

    }

}

return ($postSeq, $adjustedOriSeq, $adjustedPostSeq);

}
```

### **#Subroutine processing indels.**

```
sub indels {

    my $oriSeq = $_[0];

    my $postSeq = "";

    my $adjustedOriSeq = "";

    my $adjustedPostSeq = "";

    my @base = split (/, $oriSeq);

    my @fourbase = ("A", "T", "C", "G");

    for(my $i = 0; $i < @base; $i++) {

        if (rand (100) <= $insertionrate) {

            print "Insertion happens.\n";

            #Generating random insersion sequence

            for ($n = 0; $n < $indellength; $n++) {

                my $randIndice = rand (1);

                if ($randIndice < 0.25) {

                    $postSeq .= $fourbase[0];

                }elseif ($randIndice < 0.5) {

                    $postSeq .= $fourbase[1];

                }elseif ($randIndice < 0.75) {

                    $postSeq .= $fourbase[2];

                }else {
```

```
        $postSeq .= $fourbase[3];  
    }  
    $adjustedOriSeq .= " "  
    $adjustedPostSeq .= "+";  
    }  
}  
if (rand (100) <= $deletionrate) {  
    print "Deletion happens.\n";
```
